# Supplementary material for: Evaluation of the implementation of an internet intervention in well-baby clinics: A pilot study
Source: PubMed Central journal article supplement — Internet Interv. 2018 May 3;13:1–7. doi: 10.1016/j.invent.2018.04.003 (PMC6112086; doi:10.1016/j.invent.2018.04.003), 2018-05-03
Supplement: mmc1.pdf [file mmc1.pdf]

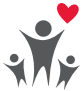

**Regionsenter for barn og unges psykiske helse**

Helseregion Øst og Sør

Regionsenter for barn og unges psykiske helse,  
Helseregion Øst og Sør

mail@r-bup.no  
Sentralbord: 22 58 60 00

www.r-bup.no

*Besøksadresse:*  
Gullhaugveien 1-3  
0484 Oslo

*Postadresse:*  
RBUP Øst og Sør  
Postboks 4623 Nydalen  
0405 Oslo

## RESSURSER

*For teknisk brukerstøtte:*  
support@changetech.no

*Les mer om barn og utvikling på:*  
www.helsestasjonstjenesten.no

*Kontaktperson RBUP:*

Filip Drozd  
Faglig ansvarlig  
filip.drozd@r-bup.no

## AKTØRER

Mamma Mia er utviklet av Changetech i samarbeid med RBUP for Norske kvinners sanitetsforening.

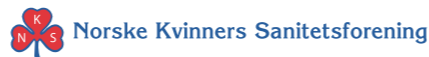

Eier og distributør i Norge

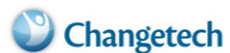

Teknisk leverandør

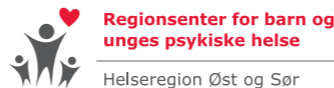

Kursansvarlig

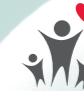

**Regionsenter for barn og unges psykiske helse**

Helseregion Øst og Sør

**MAMMA MIA  
FORELDRE &  
BARN**

**RBUP**

## TREDJE OPPFØLGINGSSAMTALE

**Når:** 2–3 uker etter fødsel, ved første hjemmebesøk.

**Formål:** Oppmuntre og bistå kvinnen til å gjenoppta Mamma Mia.

### Samtalemal

- Fortell om dine erfaringer og opplevelse av Mamma Mia?
- Hva har vært noen av fordelene/ulempene med Mamma Mia for deg?
- Hva følte du når [...]? Hva tenker du om det nå? Det jeg forstår ut ifra hva du sier er [...]

*Oppfølgingsspørsmål ved ambivalens eller ønske om å avbryte:*

- Hva fikk deg til å begynne med Mamma Mia? [Motivasjon]
- Hvorfor var [...] viktig? Har dette endret seg? [Kjernemotivasjonen]
- Hva tenker du om å bruke Mamma Mia videre? [Skape refleksjon]
- Kan jeg forteller litt om hva som kommer i programmet? [Be om tillatelse]

**TIPS:** Ved tidlig fødsel kan kvinnen hoppe frem til den delen av programmet som handler om tiden etter fødsel ved å sende en SMS med kodeord CHANGETECH MAMMA til 26001.

## FJERDE OPPFØLGINGSSAMTALE

**Når:** Om lag 6 uker etter fødsel

**Formål:** Åpne for samtale om følelsesmessige temaer, drøfte temaer fra Mamma Mia og oppmuntre til videre bruk

### Samtalemal

- Fortell om dine erfaringer og opplevelse av Mamma Mia?
- Hva har vært noen av fordelene med Mamma Mia for deg?
- Hva har vært noen av ulempene med Mamma Mia for deg?
- Hva er grunnen til at du ikke bruker Mamma Mia?

Oppfølgingsspørsmål:

- Hva følte du når [...]? [Øke affektbevissthet]
- Hva tenker du om det nå? [Skape refleksjon]
- Det jeg forstår fra hva du forteller er [...] [Meningsdannelse og oppsummering]

**TIPS:** Oppmuntre til videre bruk av programmet. Det kommer mer informasjon om barn og tilknytning som foreldre opplever som lærerikt og nyttig (bl.a. gradert trøst og vente, se og undre).

## OM DEPRESJON

- Edinburgh Postnatal Depression Scale (EPDS)
- Metakognitiv terapi (ved EPDS-skåre  $\geq$  9)
  - Oppmerksomhetstrening
  - Omformuler bekymringer og grublerier (ABCDE-teknikken)
  - Skriv ned og strukturer vanskelige hendelser og tanker (4 dager, 15 min/dag)
  - Kognitiv defusjon (verbal loop, Tigerøvelsen, Dagdrømming, mfl.)
  - La tankene vandre som skyer på himmelen eller blader i en bekk
- Søk partnerstøtte
- Ring Mental helses hjelpetelefon: 116 123
- Snakk med jordmor, helsesøster og fastlege, om nødvendig be om henvisning

**TIPS:** Utforsk om kvinnen kan be om partnerstøtte og på hvilken måte. Oppfordre kvinnen til å unne seg hjelp og bruk helsestasjonens henvisningsrutiner og tiltak (f.eks. Edinburghmetoden).

## OM GOD PSYKISK HELSE

- Hyggelige aktiviteter (delta i barselgruppe, treff en venn, hagearbeid, mv.)
- Mindfulness (amming, pusteøvelse, lytt til gong-en, muskelavspenning)
- Takknemlighet (hva har vært bra i dag og hvorfor skjedde dette meg?)
- Nevn 3 gode ting som har skjedd deg i dag (f.eks. før en dagbok)
- Gjør en god gjerning
- Gi noen et kompliment (f.eks. partner eller kollega)
- «Best mulig selv»-øvelsen
- Bruk dine karakterstyrker – gjør det du er best til!
- Fysisk aktivitet (10 min. med moderat intensitet (andpusten))

**TIPS:** Barn sover ofte urolig på natten, unngå derfor å vekke de i dyp søvn på dagen, selv for ivrige gjester. Bruk tiden til egen hvile når barnet sover på dagen og la alt annet vente.

## OM Å BLI KJENT MED BARNET

- Barnets tilstander: (1) dyp søvn, (2) lett søvn, (3) døsig, (4) våken, rolig, oppmerksom, (5) våken, motorisk aktiv, sutrete og (6) gråt
- Imitasjon (f.eks. strekk ut tungen eller lag rund munn–vent på respons, det tar tid)
- Babymassasje (hva liker hun/han og hvordan ser du det?)
- Vent 10 sekunder, se og beskriv hva barnet gjør, undre deg og vær nysgjerrig på hva barnet ditt tenker og føler
- Gi barnet pauser (f.eks. når det snur seg vekk) og fortsett ved klarsignal fra barnet
- Gradert trøst: (1) vis ansikt, (2) prat rolig med barnet, (3) la barnet holde en finger, (4) gi barnet en finger i den andre hånden også, (5) ta opp barnet og hold det, og (6) vugge barnet i ro
- Tegn på behov for nedroing: (1) Rask og uregelmessig pust, endringer i hudfarge, (2) kavete, uorganiserte bevegelser, (3) blikkunngåelse eller fjern i blikket. Er barnet trøtt, slitent, kaldt, varmt, har vondt, e.l.?

**TIPS:** Jeg liker å være sammen med deg, og jeg trenger din støtte når jeg utforsker alt nytt. Jeg ønsker at du passer på meg, hjelper meg og gleder deg over meg. Jeg trenger at du beskytter meg, viser godhet og trøster meg.

## OM PARFORHOLDET

- Gjør en god gjerning for din partner
- Vis interesse for din partner (hva er han/hun opptatt av, hvordan har han det, hvordan er jobben, osv.)
- Hold hverandre oppdatert, sett av tid til hverandre
- Ta vare på gode øyeblikk (mimre)
- Del hverandres forventninger til den andre, til egentid, til tid sammen, mv.
- Hva kan dere gjøre for å holde på nærheten? (F.eks. legge seg 15 min. tidligere)
- God kommunikasjon: (1) Observere, uten å tolke, (2) identifisere egne følelser, (3) ta ansvar for egne behov og (4) uttrykke behov på en vennlig måte
- Hvordan krangler dere og hvordan oppleves det?
  - Sørg for en myk start på samtalen, ingen klandring
  - Bruk lytte-og-tale-teknikken
  - Uttrykk positive følelser og glede

**TIPS:** Prioriter hverandre, ikke bare barnet. Hold på nærheten, del gode opplevelser og lytt til hverandre. Tenk det beste om hverandre, når tretthet og manglende nattesøvn tærer på.
