# Supplementary material for: Evaluation of the implementation of an internet intervention in well-baby clinics: A pilot study
Source: PubMed Central journal article supplement — Internet Interv. 2018 May 3;13:1–7. doi: 10.1016/j.invent.2018.04.003 (PMC6112086; doi:10.1016/j.invent.2018.04.003), 2018-05-03
Supplement: mmc2.pdf [file mmc2.pdf]

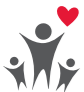

Regionsenter for barn og unges psykiske helse

Helseregion Øst og Sør

Regionsenter for barn og unges psykiske helse, Helseregion Øst og Sør

mail@r-bup.no  
Sentralbord: 22 58 60 00

www.r-bup.no

*Besøksadresse:*  
Gullhaugveien 1-3  
0484 Oslo

*Postadresse:*  
RBUP Øst og Sør  
Postboks 4623 Nydalen  
0405 Oslo

## RESSURSER

*For teknisk brukerstøtte:*  
support@changetech.no

*Les mer om barn og utvikling på:*  
www.helsestasjonstjenesten.no

*Kontaktperson RBUP:*

Filip Drozd  
Faglig ansvarlig  
filip.drozd@r-bup.no

## AKTØRER

Mamma Mia er utviklet av Changetech i samarbeid med RBUP for Norske kvinners sanitetsforening.

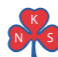

Norske Kvinners Sanitetsforening

Eier og distributør i Norge

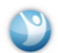

Changetech

Teknisk leverandør

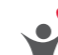

Regionsenter for barn og unges psykiske helse

Helseregion Øst og Sør

Kursansvarlig

## OM Å BLI KJENT MED BARNET

- Fantasibabyen (hvem er hun eller han?)
- Ligg musestille og kjenn på magen (hvem er hun eller han?)
- Les og syng for babyen (hvordan reagerer babyen på stemmen din?)
- Barnets utvikling (høyde, vekt, syn, hørsel, hukommelse, hud, hår, mv.)
- Hvordan reagerer barnet når du er stille? Aktiv? Spiser ulik type mat og drikke? osv.

**TIPS:** Jeg liker når vi kan snakke sammen, selv om jeg er i magen din. Stryk på meg, les og syng for meg, og lytt til meg når jeg beveger meg. Bli kjent med meg!

## OM PARFORHOLDET

- Gjør en god gjerning for din partner
- Vis interesse for din partner (hva er han/hun opptatt av, hvordan har han det, hvordan er jobben, osv.)
- Hold hverandre oppdatert, sett av tid til hverandre
- Ta vare på gode øyeblikk (mimre, se i fotoboken)
- Del hverandres forventninger til den andre, til tiden med barnet, foreldrepermisjon, fødsel, besøk, mv.
- Hvordan krangler dere og hvordan oppleves det?
  - Sørg for en myk start på samtalen, ingen klandring
  - Bruk lytte-og-tale-teknikken
  - Uttrykk positive følelser og glede

**TIPS:** Parforholdet trenger litt påfyll og næring, før barnet kommer. Da blir det kanskje litt mindre tid til hverandre. Om dere har det bra, kan det være godt å få bekreftet dette og vedlikeholde forholdet.

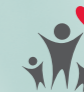

Regionsenter for barn og unges psykiske helse

Helseregion Øst og Sør

# MAMMA MIA GRAVID

**RBUP**

## FORBEREDELSE

**Når:** Innen oppstart av rekruttering og orientering om Mamma Mia

**Formål:** Tilrettelegge for rekruttering og oppfølging av gravide

**Oppgave:** Lagre lenke til påmelding av gravide for Mamma Mia, lett tilgjengelig For lenke, se tjenestestedets implementeringsplan.

**TIPS:** Lagre lenke til påmelding lett tilgjengelig i Favoritter, Bokmerker, Populære sider eller lignende i nettleseren din på helsestasjonen. Spør IT eller kolleger om hjelp ved behov.

## ORIENTERING

**Når:** Svangerskapskontroll i svangerskapsuke 8–12

**Formål og oppgave:** Orienterer kvinnen om Mamma Mia slik at hun kan vurdere bruk av programmet

### Om Mamma Mia:

- Internettprogram for å støtte deg på veien mot å bli mamma
- Fremme god psykisk helse og forebygge fødselsdepresjon
- Programmet foregår via e-post og følger dere til barnet er 6 måneder
- Lær om barnet i magen og hvordan dere kan bli kjent helt fra starten
- Om deg, det å bli mor, dine tanker og følelser
- Om det å bli foreldre, og hvordan styrke og støtte hverandre
- Om lag 10 minutter per gang
- Oppfølging fra jordmor og helsesøster

**TIPS:** Skriv og del ut informasjonsbrosjyre om Mamma Mia til de som virker positive og interesserte

## PÅMELDING

**Når:** Svangerskapskontroll i svangerskapsuke 17–24

**Formål:** Rekruttering og påmelding av gravide til Mamma Mia

### Oppgave:

- Orienterer kvinnen om Mamma Mia hvis ikke dette er gjort tidligere (se pkt. 2 – Orientering)
- Utforske eksklusjonskriteriene

### Eksklusjonskriterier:

- Har ingen tilgang til internett
- Problematisk internettbruk (f.eks. spillproblemer, avhengighet av sosiale medier, e.l.)
- Enslig og uplanlagt graviditet, evt. familie sammensatt av to mødre eller fedre
- Er i en dyp, alvorlig krise (f.eks. samlivsbrudd, vold i nære relasjoner, rusproblemer, o.l.)

**TIPS:** Husk å journalføre at mor bruker Mamma Mia for videre oppfølging. Minn om at kvinnen kan logge inn med e-postadresse og passord via programhjemmesiden på [program.changetech.no/sanitetskvinnene/mammamia](http://program.changetech.no/sanitetskvinnene/mammamia)

## FØRSTE OPPFØLGINGSSAMTALE

**Når:** Svangerskapskontroll i svangerskapsuke 32–36

**Formål:** Åpne for samtale om følelsesmessige temaer, drøfte temaer fra Mamma Mia og oppmuntre til videre bruk

### Samtalemal

- Fortell om dine erfaringer og opplevelse av Mamma Mia?
- Hva har vært noen av fordelene med Mamma Mia for deg?
- Hva har vært noen av ulempene med Mamma Mia for deg?
- Hva er grunnen til at du ikke bruker Mamma Mia?

### Oppfølgings spørsmål:

- Hva følte du når [...]? [Øke affekt bevissthet]
- Hva tenker du om det nå? [Skape refleksjon]
- Det jeg forstår ut ifra hva du forteller er [...] [Meningsdannelse]

**TIPS:** Oppmuntre til videre bruk av programmet. Det kommer ny informasjon etter fødsel om barnet som foreldre opplever som lærerikt og nyttig. Minn om å legge igjen mobilnummer i Mamma Mia, i tilfelle tidlig fødsel.

## OM DEPRESJON

- Edinburgh Postnatal Depression Scale (EPDS)
- Metakognitiv terapi (ved EPDS-skåre  $\geq 9$ )
  - Oppmerksomhetstrening
  - Omformuler bekymringer og grublerier (ABCDE-teknikken)
  - Skriv ned og strukturer vanskelige hendelser og tanker (4 dager, 15 min/dag)
  - Kognitiv defusjon (verbal loop, Tigerøvelsen, Dagdrømming, mfl.)
  - La tankene vandre som skyer på himmelen eller et passerende tog
- Søk partnerstøtte
- Ring Mental helses hjelpetelefon: 116 123
- Snakk med jordmor, helsesøster og fastlege, om nødvendig be om henvisning

**TIPS:** Utforsk om kvinnen kan be om partnerstøtte og på hvilken måte. Oppfordre kvinnen til å unne seg hjelp og bruk helsestasjonens henvisningsrutiner og tiltak (f.eks. Edinburghmetoden).

## OM GOD PSYKISK HELSE

- Hyggelige aktiviteter (les en bok, treff en venninne, hagearbeid, mv.)
- Mindfulness (pusteøvelse, lytt til gong-en, finn ditt mantra, muskelavspenning)
- Takknemlighet (hva har vært bra i dag og hvorfor skjedde dette meg?)
- Gjør en god gjerning
- Gi noen et kompliment (f.eks. partner eller kollega)
- Fysisk aktivitet (10 min. med moderat intensitet (andpusten))

**TIPS:** Forbered deg så godt du kan, men vær åpen og fleksibel for at graviditeten, fødselen og barseltiden ikke alltid blir som planlagt – vær samtidig forberedt på at planene dine kan endre seg.
